# Supplementary material
Source: publisher figshare collection journal article supplement (https://acs.figshare.com/ndownloader/files/8225621)
Supplement: Supplementary file 1 [file 8225621]

# *Supporting Information*

## Photoluminescence Segmentation within Individual Hexagonal Monolayer Tungsten Disulfide Domains Grown by Chemical Vapor Deposition

*Yuewen Sheng<sup>1</sup>, Xiaochen Wang<sup>1</sup>, Kazunori Fujisawa<sup>2</sup>, Siqi Ying<sup>3</sup>, Ana L. Elias<sup>2</sup>, Zhong Lin<sup>2</sup>,  
Wenshuo Xu<sup>1</sup>, Yingqiu Zhou<sup>1</sup>, Alexander M. Korsunsky<sup>3</sup>, Harish Bhaskaran<sup>1</sup>, Mauricio  
Terrones<sup>2,4</sup>, Jamie H. Warner<sup>1\*</sup>*

<sup>1</sup>Department of Materials, University of Oxford, Parks Road, Oxford OX1 3PH, United  
Kingdom

<sup>2</sup>Department of Physics and Center for 2 Dimensional and Layered Materials, The  
Pennsylvania State University, University Park, PA 16802, USA

<sup>3</sup>Department of Engineering Science, University of Oxford, Parks Road, Oxford OX1 3PJ,  
United Kingdom

<sup>4</sup>Department of Chemistry and Department of Materials Science & Engineering, The  
Pennsylvania State University, University Park, PA 16802, USA

[\\*Jamie.warner@materials.ox.ac.uk](mailto:Jamie.warner@materials.ox.ac.uk);

## Supplementary Figures

**Figure S1. Identification of monolayer and bilayer WS<sub>2</sub>**

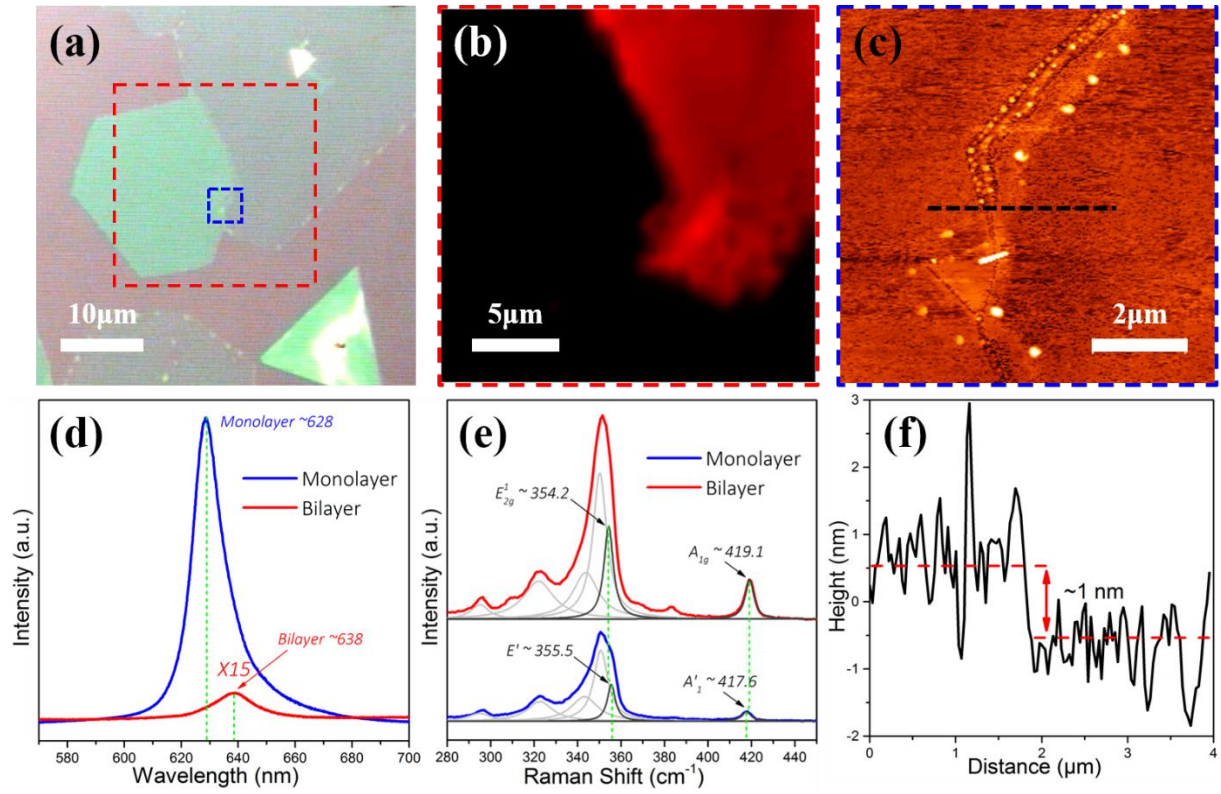

**Figure S1. Identification of monolayer and bilayer WS<sub>2</sub>.** (a) Optical image of an area covered with both bilayer and monolayer WS<sub>2</sub>. Light pink is the bare substrate and light green represents monolayer WS<sub>2</sub>. Scale bar: 10 μm. (b) PL mapping obtained from the red dashed region in (a). Scale bar: 5 μm. (c) AFM topological mapping of the blue dashed square in (a). Scale bar: 2 μm. (d) PL and (e) Raman spectra of monolayer (blue line) and bilayer (red line) WS<sub>2</sub> on SiO<sub>2</sub>/Si, respectively. (f) Corresponding height profile taken across the black dashed line in (c).

Figure S1(a) presents a region covered by both bilayer and monolayer WS<sub>2</sub>. Figures S1(c) and (f) give an AFM measurement of the blue dashed region in Figure S1(a), showing the thickness between monolayer and bilayer WS<sub>2</sub> is ~1.0 nm, indicating the capability of

thickness measurement in nanoscale. As can be seen from Figure S1(d), under the same excitation laser power and CCD acquisition time, the PL intensity from the monolayer is about 150 times stronger than that from the bilayer region, due to the emergence of indirect band gap transitions in bilayer WS<sub>2</sub> and the direct band gap transition for monolayer WS<sub>2</sub>. There is a 10 nm redshift of the PL Peak position found for bilayer WS<sub>2</sub> compared with monolayer sample, which is in agreement with other literature results.<sup>1-4</sup> Figure S1(b) is the PL mapping of the red dashed area in Figure S1(a), confirming that integrated intensity of monolayer WS<sub>2</sub> is much stronger than that obtained from bilayer. Raman spectroscopy can also help in determining monolayer from bilayer, as shown in Figure S1(e). The blue line represents the Raman spectrum from monolayer WS<sub>2</sub>. Curve fitting using multiple Lorentzian distributions was performed to extract the peak positions at 355.5 and 417.6 cm<sup>-1</sup> in single-layer WS<sub>2</sub> for in-plane (E') and out-of-plane vibration mode (A<sub>1</sub>') modes, respectively. Bilayer WS<sub>2</sub> has a slightly different Raman spectrum (red line), with in-plane vibration mode (E<sub>2g</sub><sup>1</sup>) blue-shifting to 354.2 cm<sup>-1</sup> and out-of-plane vibration mode (A<sub>1g</sub>) red-shifting to 419.1 cm<sup>-1</sup>, consistent with our previously reported literatures.<sup>5</sup>

**Figure S2. Optical images of WS<sub>2</sub> shape distribution**

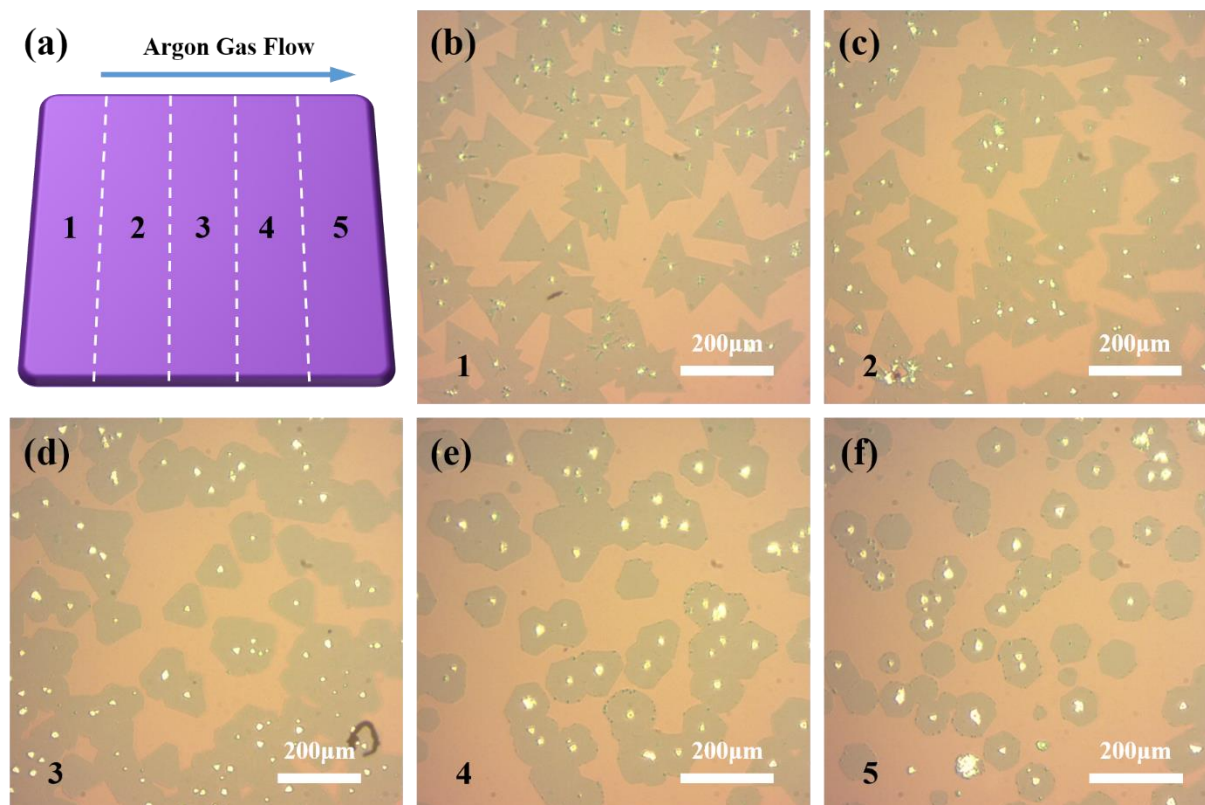

**Figure S2. Optical images of WS<sub>2</sub> shape distribution.** (a) Schematic illustration showing the spatial sectioning of the growth substrate into five sections along the gas flow direction. The size of the substrate is 2 by 2 cm. (b-f) The corresponding optical images from the center of each section, respectively. Each section of sections 2–4 has a width of 2–3 mm, while sections 1 and 5 have a width of ~5 mm. Scale bar: 200  $\mu\text{m}$ .

**Figure S3. Optical images of monolayer WS<sub>2</sub> in different shapes**

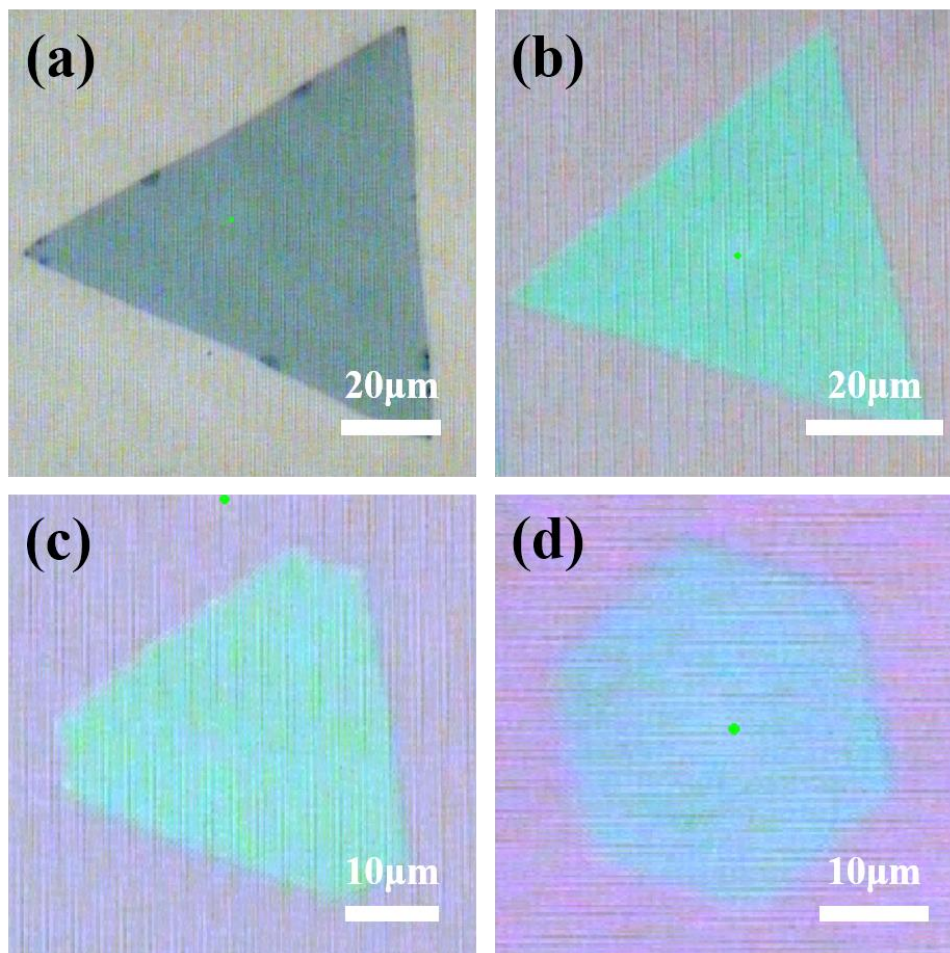

**Figure S3. Optical images of monolayer WS<sub>2</sub> in different shapes.** (a) Triangle (uniform). Scale bar: 20 μm. (b) Triangle (edge enhanced). Scale bar: 20 μm. (c) Truncated triangle. Scale bar: 10 μm. (d) Hexagon. Scale bar: 10 μm. Two of them were grown on Si substrate with 90 nm SiO<sub>2</sub>, while the other two were grown on 300 nm SiO<sub>2</sub>.

Figure S3 presents the optical images of monolayer WS<sub>2</sub> in different shapes. They all look very uniform under optical microscope and the contrast indicates monolayer WS<sub>2</sub> according to PL measurement.



**Figure S4. Characterization of monolayer WS<sub>2</sub> with symmetric multilayer stacking**

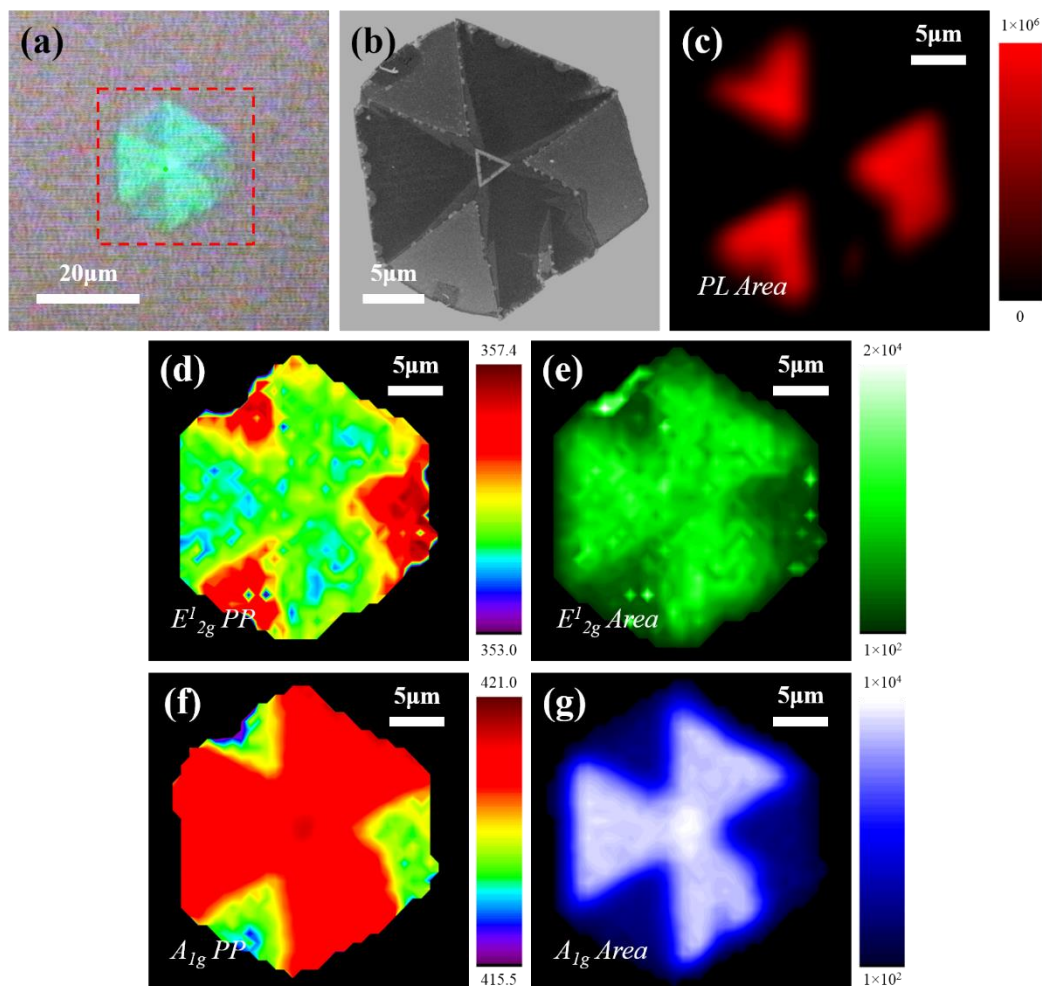

**Figure S4. Raman and PL mapping of hexagonal monolayer WS<sub>2</sub> with symmetric multilayer stacking.** (a) Optical image of hexagonal monolayer WS<sub>2</sub> crystal with multilayer stacking. Scale bar: 20 μm. (b) SEM image of the same crystal in (a). Scale bar: 5 μm. (c-g) PL and Raman mapping obtained from the red dashed square shown in (a), showing (c) PL integrated intensity, (d) E<sub>2g</sub><sup>1</sup> peak position and (e) integrated intensity as well as (f) A<sub>1g</sub> peak position and (g) integrated intensity respectively, indicating obvious distinction between monolayer and few-layer WS<sub>2</sub>. Scale bar: 5 μm.

**Figure S5. PL mappings of hexagonal WS<sub>2</sub> at different rotation angles**

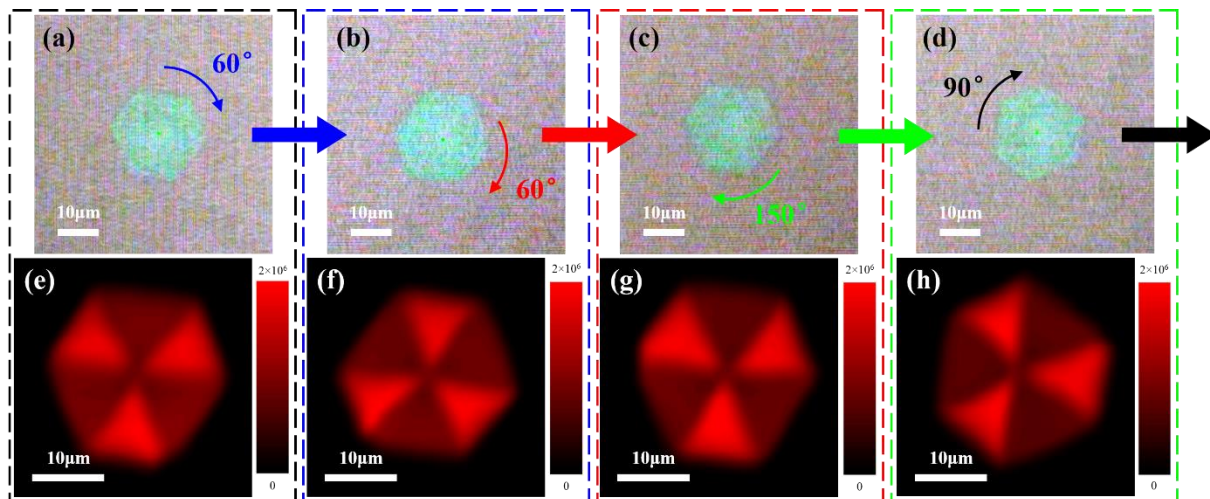

**Figure S5. PL mappings and optical images of one typical monolayer hexagonal WS<sub>2</sub> at different rotation angles.** (a-d) Optical images of one typical monolayer hexagonal WS<sub>2</sub> domain at rotation angles of 0° (Blue), 60° (Red), 120° (Green) and 270° (Black), respectively. Scale bar: 10 μm. (e-h) The corresponding PL mappings of the same hexagonal WS<sub>2</sub> crystal, showing the same symmetric patterns at different rotation angles. Scale bar: 10 μm.

**Figure S6. Optical and SEM images of degraded WS<sub>2</sub> crystal**

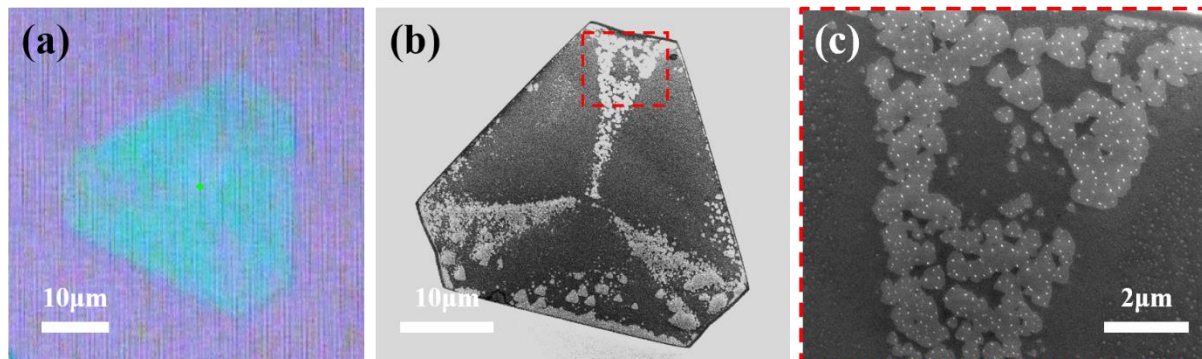

**Figure S6.** (a, b) Optical and SEM images of the degraded WS<sub>2</sub> crystal on SiO<sub>2</sub>/Si substrate. Scale bar: 10 μm. (c) Zoomed-in SEM image of the red dashed area in (b). Scale bar: 2 μm.

Figures S6(a) and (b) present the optical and SEM images of the degraded WS<sub>2</sub> crystal, respectively. Figure S6(c) show the zoomed-in SEM image of the red dashed area in Figure S6(b), indicating the degraded part was formed by small triangles.



## Supplementary Tables

**Table S1. Lorentzian curve fitting results of the PL spectra taken from six marked spots in hexagonal monolayer WS<sub>2</sub> as shown in Figure 1(d)**

| Region               | Exciton (A) |             | Trion (A <sup>-</sup> ) |             | A/A <sup>-</sup> |
|----------------------|-------------|-------------|-------------------------|-------------|------------------|
|                      | PP (eV)     | Area (a.u.) | PP (eV)                 | Area (a.u.) |                  |
| i                    | 1.976       | 239763.9    | 1.957                   | 138133.6    | 1.74             |
| ii                   | 1.975       | 115114.5    | 1.956                   | 60897.5     | 1.89             |
| iii                  | 1.976       | 238423.7    | 1.957                   | 140323.2    | 1.70             |
| iv                   | 1.975       | 106245.1    | 1.956                   | 52738.5     | 2.01             |
| v                    | 1.976       | 236639.7    | 1.957                   | 137155.7    | 1.73             |
| vi                   | 1.976       | 118042.0    | 1.956                   | 60706.5     | 1.94             |
| Average (i, iii, v)  | 1.976       | 238275.8    | 1.957                   | 138537.5    | 1.72             |
| Stdev (i, iii, v)    | 0.000       | 1567.4      | 0.000                   | 1621.9      | 0.02             |
| Average (ii, iv, vi) | 1.975       | 113133.9    | 1.956                   | 58114.2     | 1.95             |
| Stdev (ii, iv, vi)   | 0.000       | 6142.8      | 0.000                   | 4656.5      | 0.06             |

**Table S2. Lorentzian curve fitting results of the Raman spectra taken from six marked spots in hexagonal monolayer WS<sub>2</sub> as shown in Figure 2(c)**

| Region               | E'                     |             | A' <sub>1</sub>        |             |
|----------------------|------------------------|-------------|------------------------|-------------|
|                      | PP (cm <sup>-1</sup> ) | Area (a.u.) | PP (cm <sup>-1</sup> ) | Area (a.u.) |
| i                    | 354.1                  | 27638.2     | 415.1                  | 10159.3     |
| ii                   | 353.8                  | 26223.6     | 415.0                  | 12213.4     |
| iii                  | 353.9                  | 31013.5     | 415.2                  | 9808.1      |
| iv                   | 353.7                  | 25980.8     | 415.0                  | 9721.1      |
| v                    | 354.0                  | 30174.4     | 415.2                  | 9825.7      |
| vi                   | 353.6                  | 23899.0     | 415.5                  | 9998.0      |
| Average (i, iii, v)  | 354.0                  | 29608.7     | 415.2                  | 9931.0      |
| Stdev (i, iii, v)    | 0.1                    | 1757.3      | 0.0                    | 197.9       |
| Average (ii, iv, vi) | 353.7                  | 25367.8     | 415.2                  | 10644.2     |
| Stdev (ii, iv, vi)   | 0.1                    | 1277.8      | 0.3                    | 1366.0      |

**Table S3. Lorentzian curve fitting results of the PL spectra taken from six marked spots in transferred hexagonal monolayer WS<sub>2</sub> as shown in Figure 3(b)**

| Region               | Exciton (A) |             | Trion (A <sup>-</sup> ) |             | A/A <sup>-</sup> |
|----------------------|-------------|-------------|-------------------------|-------------|------------------|
|                      | PP (eV)     | Area (a.u.) | PP (eV)                 | Area (a.u.) |                  |
| i                    | 2.016       | 46887.3     | 1.976                   | 81016.8     | 0.58             |
| ii                   | 2.016       | 43113.6     | 1.976                   | 65163.0     | 0.66             |
| iii                  | 2.014       | 45577.3     | 1.974                   | 79973.7     | 0.57             |
| iv                   | 2.014       | 47783.4     | 1.974                   | 61335.7     | 0.78             |
| v                    | 2.016       | 47494.3     | 1.973                   | 73174.7     | 0.65             |
| vi                   | 2.015       | 39161.9     | 1.973                   | 60900.1     | 0.64             |
| Average (i, iii, v)  | 2.015       | 46653.0     | 1.974                   | 78055.1     | 0.60             |
| Stdev (i, iii, v)    | 0.001       | 979.8       | 0.001                   | 4258.6      | 0.04             |
| Average (ii, iv, vi) | 2.015       | 43352.9     | 1.974                   | 62466.3     | 0.69             |
| Stdev (ii, iv, vi)   | 0.001       | 4315.7      | 0.002                   | 2345.6      | 0.07             |

**Table S4. Lorentzian curve fitting results of the PL spectra taken from the marked spots in a typical hexagonal monolayer WS<sub>2</sub> crystal before and after treatment as shown in Figures 5(b) and (h) respectively**

| <i>Before Treatment</i> |             |             |                         |             |                  |
|-------------------------|-------------|-------------|-------------------------|-------------|------------------|
| Region                  | Exciton (A) |             | Trion (A <sup>-</sup> ) |             | A/A <sup>-</sup> |
|                         | PP (eV)     | Area (a.u.) | PP (eV)                 | Area (a.u.) |                  |
| i                       | 1.978       | 38840.0     | 1.960                   | 18800.0     | 2.07             |
| ii                      | 1.976       | 14356.0     | 1.951                   | 5193.4      | 2.76             |
| iii                     | 1.977       | 37117.0     | 1.957                   | 20273.0     | 1.83             |
| iv                      | 1.975       | 14939.0     | 1.951                   | 5068.0      | 2.95             |
| v                       | 1.977       | 28999.0     | 1.956                   | 15184.0     | 1.91             |
| vi                      | 1.976       | 14330.0     | 1.950                   | 4838.9      | 2.96             |
| Average (i, iii, v)     | 1.977       | 34985.3     | 1.958                   | 18085.7     | 1.94             |
| Stdev (i, iii, v)       | 0.001       | 5255.4      | 0.002                   | 2618.6      | 0.12             |
| Average (ii, iv, vi)    | 1.976       | 14541.7     | 1.951                   | 5033.4      | 2.89             |
| Stdev (ii, iv, vi)      | 0.001       | 344.3       | 0.001                   | 179.8       | 0.11             |
| <i>After Treatment</i>  |             |             |                         |             |                  |
| i'                      | 1.973       | 20566.0     | 1.958                   | 15297.0     | 1.34             |
| ii'                     | 1.969       | 12098.0     | 1.950                   | 7668.7      | 1.58             |
| iii'                    | 1.973       | 15907.0     | 1.957                   | 11472.0     | 1.39             |
| iv'                     | 1.970       | 11867.0     | 1.951                   | 6847.7      | 1.73             |
| v'                      | 1.972       | 17681.0     | 1.953                   | 12757.0     | 1.39             |
| vi'                     | 1.968       | 11642.0     | 1.949                   | 7301.2      | 1.59             |
| Average (i', iii', v')  | 1.973       | 18051.3     | 1.956                   | 13175.3     | 1.37             |
| Stdev (i', iii', v')    | 0.001       | 2351.5      | 0.003                   | 1946.5      | 0.02             |
| Average (ii', iv', vi') | 1.969       | 11869.0     | 1.950                   | 7272.5      | 1.64             |
| Stdev (ii', iv', vi')   | 0.001       | 228.0       | 0.001                   | 411.3       | 0.09             |

## Reference

- (1) Zeng, H.; Liu, G.-B.; Dai, J.; Yan, Y.; Zhu, B.; He, R.; Xie, L.; Xu, S.; Chen, X.; Yao, W.; Cui, X. Optical Signature of Symmetry Variations and Spin-Valley Coupling in Atomically Thin Tungsten Dichalcogenides. *Sci. Rep.* **2013**, *3*, 1608.
- (2) Gutiérrez, H. R.; Perea-López, N.; Elías, A. L.; Berkdemir, A.; Wang, B.; Lv, R.; López-Urías, F.; Crespi, V. H.; Terrones, H.; Terrones, M. Extraordinary Room-Temperature Photoluminescence in Triangular WS<sub>2</sub> Monolayers. *Nano Lett.* **2013**, *13*, 3447–3454.
- (3) Zhao, W.; Ghorannevis, Z.; Chu, L.; Toh, M.; Kloc, C.; Tan, P.; Eda, G. Evolution of Electronic Structure in Atomically Thin Sheets of WS<sub>2</sub> and WSe<sub>2</sub>. *ACS Nano* **2013**, *7*, 791–797.
- (4) He, Z.; Xu, W.; Zhou, Y.; Wang, X.; Sheng, Y.; Rong, Y.; Guo, S.; Zhang, J.; Smith, J. M.; Warner, J. H. Biexciton Formation in Bilayer Tungsten Disulfide. *ACS Nano* **2016**, *10*, 2176–2183.
- (5) He, Z.; Sheng, Y.; Rong, Y.; Lee, G.; Li, J.; Warner, J. H. Layer-Dependent Modulation of Tungsten Disulfide Photoluminescence by Lateral Electric Fields. *ACS Nano* **2015**, *9*, 2740–2748.
